# Supplementary material
Source: HighWire-hosted journal article supplement (https://bmjleader.bmj.com/highwire/filestream/3006/field_highwire_adjunct_files/0/leader-2022-000653supp001_data_supplement.pdf)
Supplement: leader-2022-000653supp001_data_supplement.pdf [file leader-2022-000653supp001_data_supplement.pdf]

**Figure S1.** Query used to identify relevant articles in the PubMed, Scopus, and Web of Science databases

("COVID\*" OR "COVID-19 pandemic" OR "pandemic\*") AND (leadership OR "public health leadership" OR leader\*) AND (skill\* OR competenc\* OR attitude\* OR characteristic\*)
